# Supplementary material for: Why school-related content knowledge for pre-service chemistry teachers should include basic concepts in organic chemistry
Source: publisher site journal article supplement (doi:10.1515/cti-2020-0033), 2021-03-31
Supplement: Supplementary file 1 [file j_cti-2020-0033_suppl_001.docx]

**Supplementary Information**

**1. Task: „Johanna and Tim“**

Johanna and Tim are late for their lecture in organic chemistry. Therefore, they missed the explanation for the Diels-Alder reaction of 1,3,10,undecatriene. It doesn’t concern them, because they think, Diels-Alder, that’s totally easy.

After the lecture, Johanna has some spare time (2 hours). She tries to write down the product for the reaction of 1,3,10-undecatriene. She then sees that she obviously forgot to write down the second reactant. Had that been removed already? She asked her friend who was there the whole time. She doesn’t listen carefully and only answers: You don’t need anything else. Then her friend leaves.

Support Johanna by explaining her why she doesn’t need a second reactant for the Diels-Alder reaction of 1,3,10-undecatrien [Tip: Use for the explanation structural formulas]

**2. Task: „School book“**

An educational publisher has asked you for an evaluation of his new school book. In the section on aromatic compounds you find the following text: “Aromatic compound became their name, because they smell aromatic. They are cyclic and planar compounds. In a chemical way they can be compared with alkenes. Like alkenes they possess double bonds. Addition reactions are therefore important reactions of aromatic compounds.

Improve those parts that can be discussed. Explain all changes you made or not made with your chemical knowledge (theories, structures, reaction mechanisms etc.).

**3. Task „project day“**

You are preparing a project day with your pupils in upper secondary on the theme “carboxylic acids and their use”. A friendly colleague gives you materials for the experiment “esterification of salicylic acid”, which she used before in her lessons.

From down the reaction mechanism for the reaction of salicylic acid with ethanol as you expect the solution from your students after they carried out the experiment. This mechanism is new for your students. Think about which content, concepts and theories should be known to your students to solve this task successfully.
